# Supplementary material for: Localization of micron-scale lithium polysulfide-rich phases causes anode heterogeneity in lean-electrolyte lithium–sulfur batteries
Source: Research Square preprint supplement (doi:10.21203/rs.3.rs-7916426/v1), 2025-11-04
Supplement: Supplementary file 1 [file c13d1aea42c7b0c514810b67.docx]

**Supplementary materials**

**of**

**Localization of micron-scale lithium polysulfide-rich phases causes anode heterogeneity in lean-electrolyte lithium–sulfur batteries**


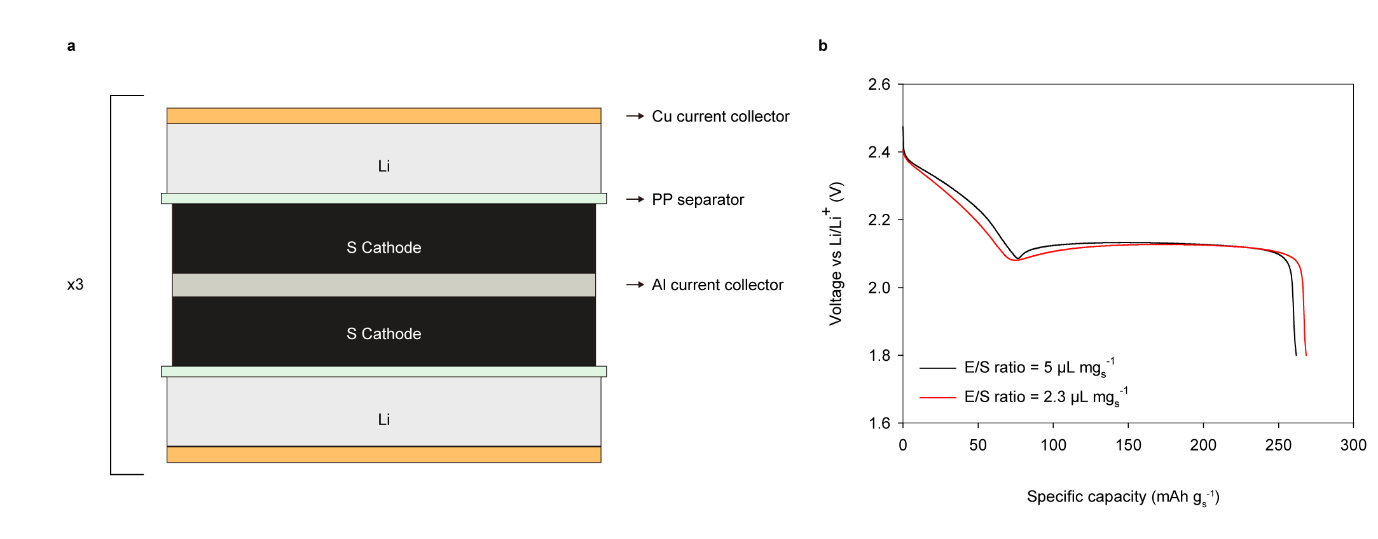


**Supplementary Figure 1. Configuration and discharge profile of the fabricated 3-stacked pouch cell with FN electrolyte. a,** Schematic illustration of the 3-stacked pouch cell consisting of two sulfur (S) cathodes and three Li metal anodes separated by propylene (PP) separators. **b**, The first discharge voltage profile at 0.05 C of the pouch cell.

**
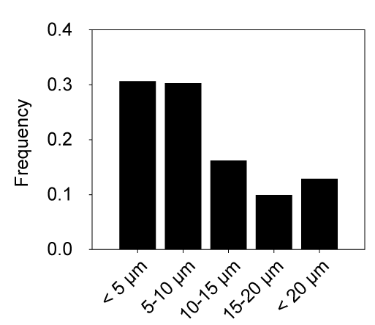
**

**Supplementary Figure 2. Statistical size distribution of the domains with LiPS residues on the Li anode at an E/S ratio of 2.3 μL mgs−1.**

**
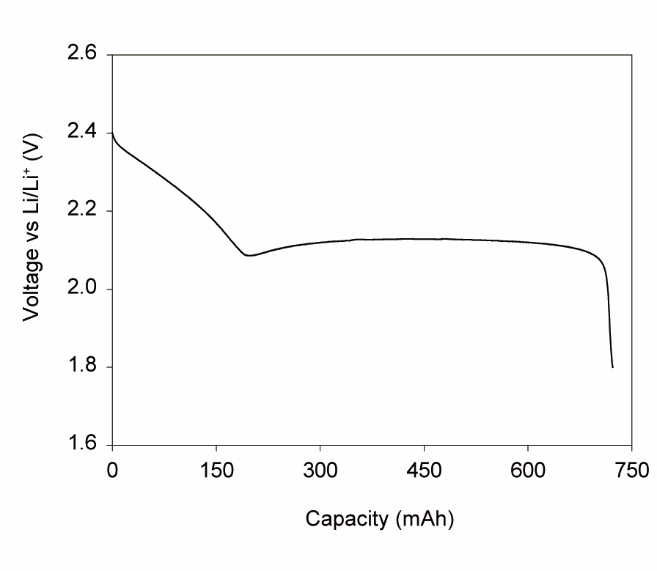
**

**Supplementary Figure 3. Discharge profile of the fabricated 8-stacked pouch cell with FN electrolyte.** The first discharge voltage profile of the pouch cell at 0.05 C, representing a discharge capacity of 0.7 Ah.

**
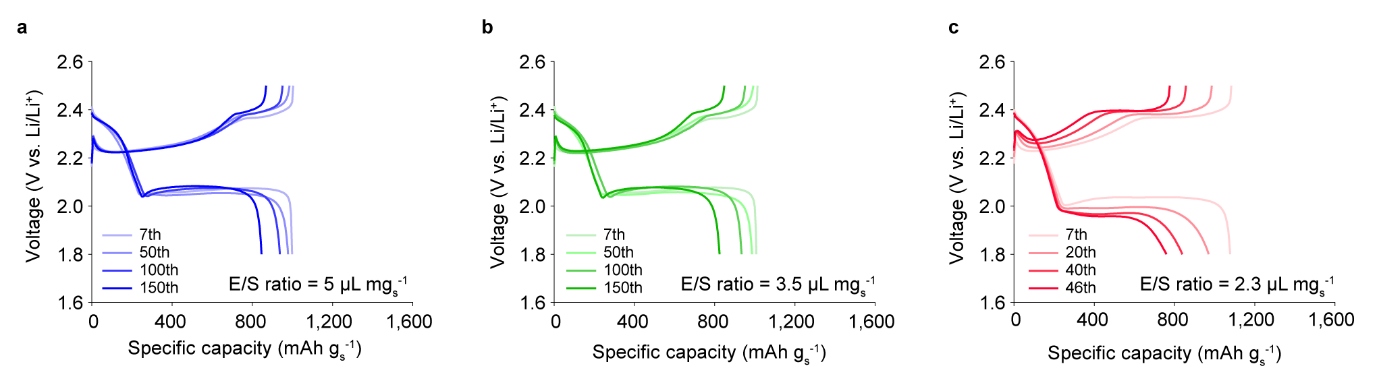
**

**Supplementary Figure 4. Specific charge–discharge voltage profiles of the Li–S pouch cells at selected cycles. a**, 5 μL mgs**−**1, **b**, 3.5 μL mgs**−**1 and **c**, 2.3 μL mgs**−**1. After two activation cycles at 0.05 C and 0.1 C, respectively, the cell was operated at 0.2 C from the 5th cycle onward.

**Supplementary Note 1.**

To quantify the concentration of LiPS in the electrolyte, we conducted a series of experiments using a prototype pouch cell assembled at an E/S ratio of 2.3 μL mgs**−**1. The cell was cycled at a rate of 0.05 C for three activation cycles, after which it was discharged to 2.1 V—corresponding to the potential at which Li2S4 reaches its maximum concentration, prior to the precipitation of insoluble Li2S. The cell was then rested for 36 hours to allow the electrolyte to reach a steady-state and maximum LiPS concentration. Following the rest period, the cell was disassembled, and the separator was collected and thoroughly washed to recover the electrolyte for ultraviolet–visible (UV–Vis) spectroscopy analysis. Electrolyte resides within the pores of the separator. The recovered solution was diluted 104-fold before measurement.

**
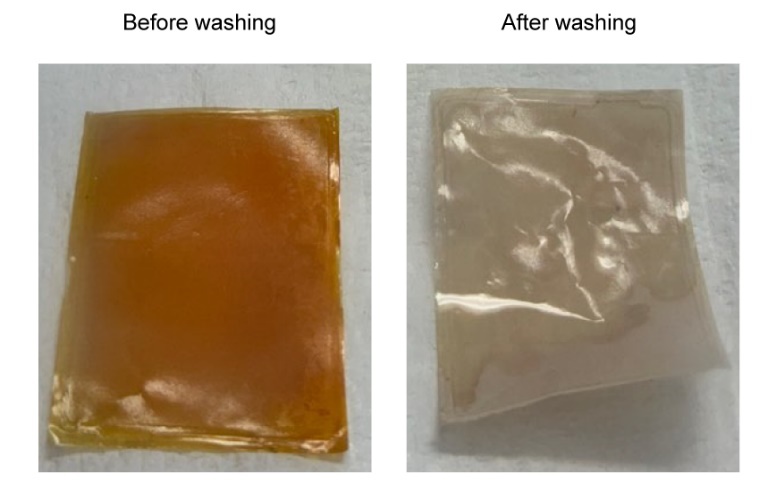
**

**Supplementary Figure 5. Digital photographs of the separator before and after washing with 1,2-dimethoxylethane.** The separator was extracted from the pouch cell after the discharge to 2.1 V (Supplementary Note 1).

**
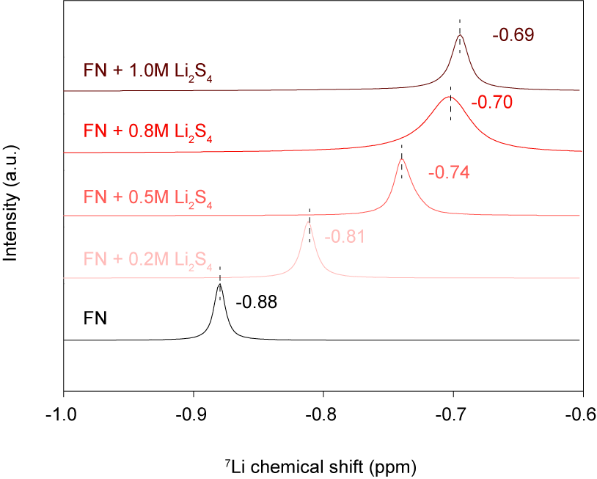
**

**Supplementary Figure 6. 7Li Nuclear Magnetic Resonance (NMR) spectra of FN and Li2S4-containing FN electrolytes with various Li2S4 concentrations.** The 7Li NMR peak gradually shifted to a lower chemical shift (upfield) with increasing Li2S4 concentration in the catholyte.

**
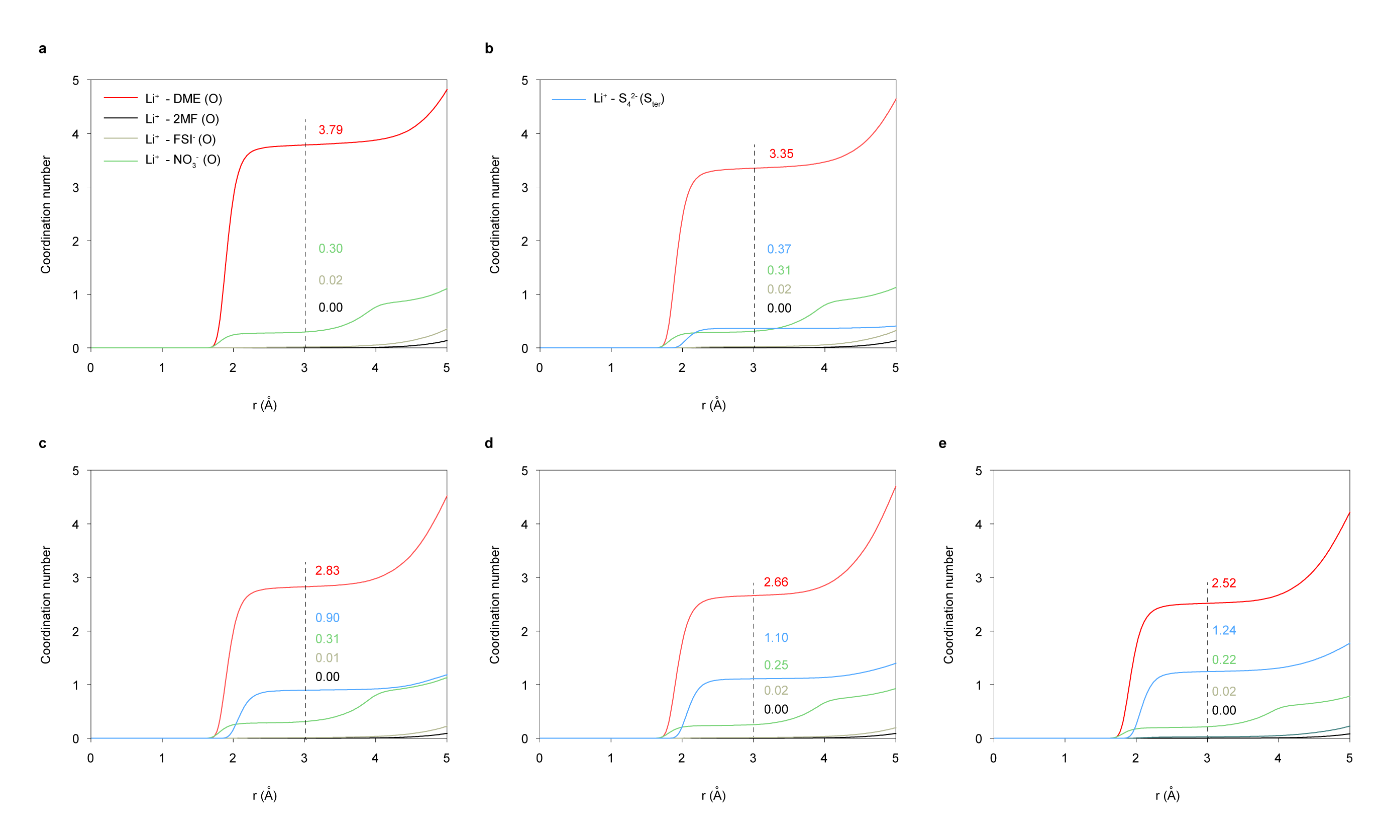
**

**Supplementary Figure 7. Coordination numbers of various electrolyte components in FN electrolyte and Li₂S₄-containing catholytes**. **a**, FN **b**, FN + 0.2M Li2S4 **c**, FN + 0.5M Li2S4 **d**, FN + 0.8M Li2S4 **e**, FN + 1.0M Li2S4. Here, Ster denotes the S atoms in S42**−** that coordinate with Li+.

**
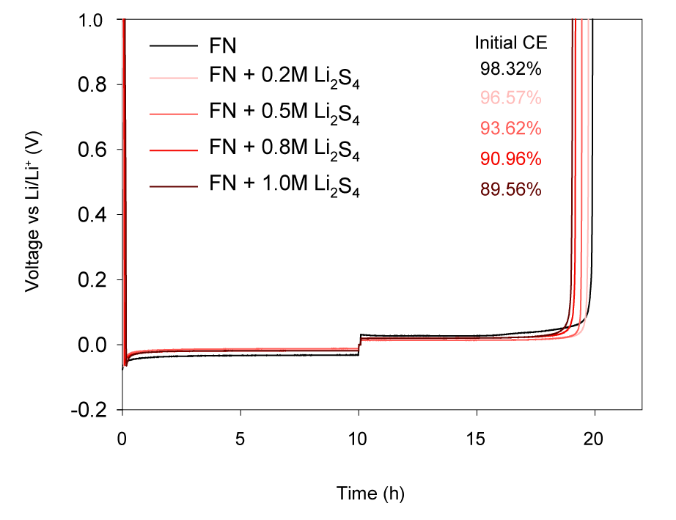
**

**Supplementary Figure 8. Initial Coulombic efficiency** (**CE) for Li plating/stripping in FN and Li2S4-containing FN electrolytes.**

**
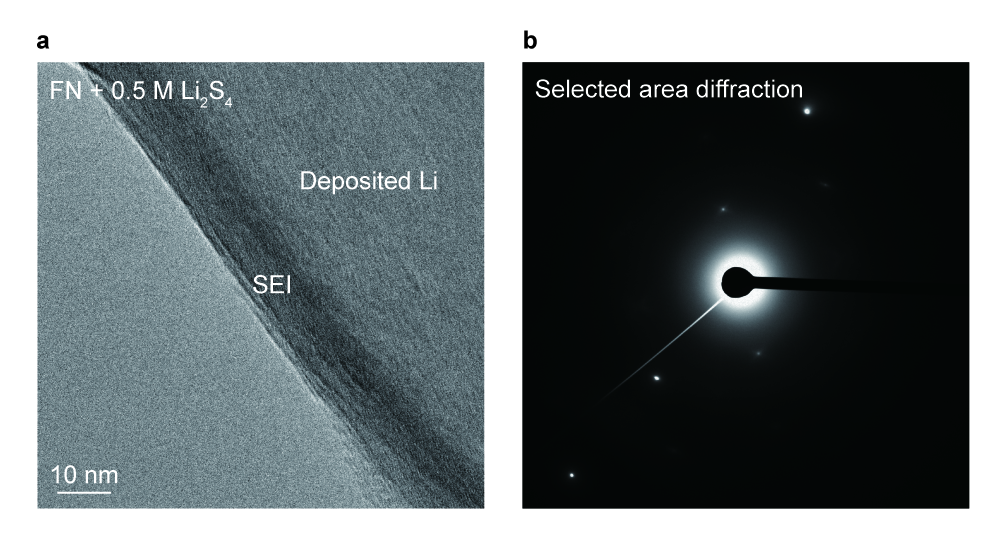
**

**Supplementary Figure 9. The structure of the SEI layer formed in FN + 0.5 M Li2S4 electrolyte.** **a,** High-resolution cryo-TEM image of the SEI layer on the Li surface. **b,** Corresponding fast Fourier transform (FFT) pattern highlighting the structural features of the SEI.

**
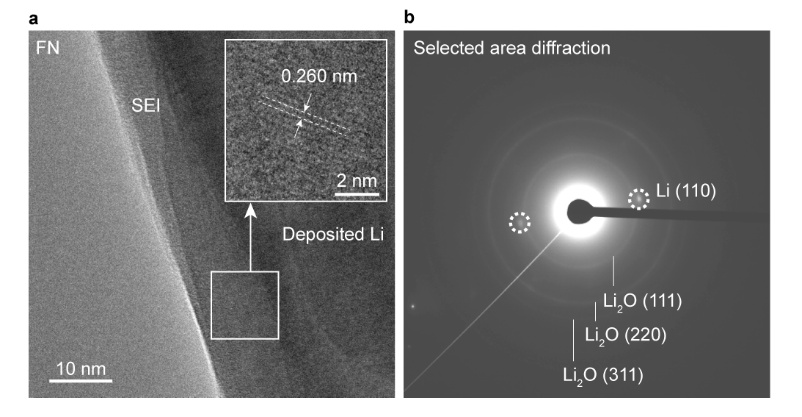
**

**Supplementary Figure 10. The structure of the SEI layer formed in FN electrolyte.** **a,** High-resolution cryo-TEM image of the SEI layer on the Li surface. **b,** Corresponding FFT pattern highlighting the structural features of the SEI.

**
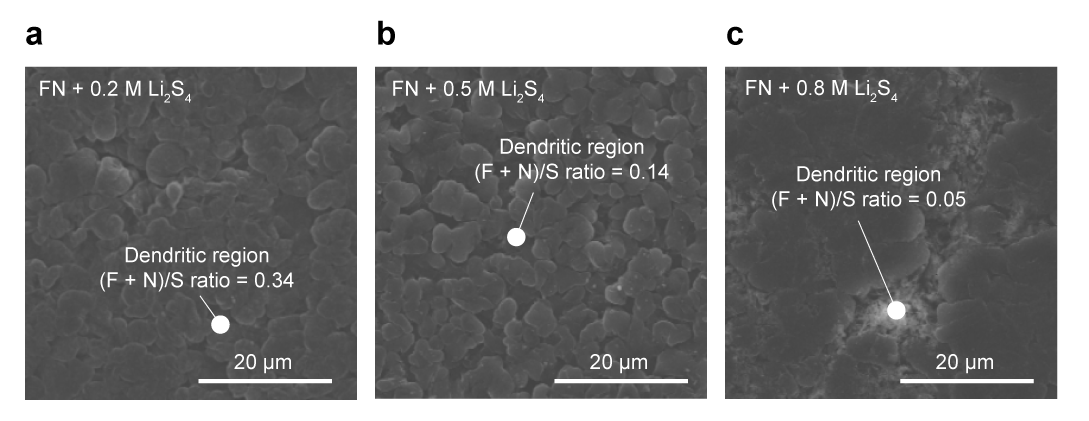
**

**Supplementary Figure 11. SEM images of Li electrode collected from Li|Ni half cell operated for 15 cycles at 1 mA cm−2 / 1 mAh cm−2 in Li2S4-containing FN electrolytes. a,** FN **+ 0.2 M Li2S4** **b,** FN **+ 0.5 M Li2S4** and **c,** FN **+ 0.8 M Li2S4.** The (F + N)/S ratios obtained from EDS analysis at the dendritic regions are indicated in each image. The decreasing (F + N)/S ratio with increasing Li2S4 concentration suggests a reduced contribution of fluorine- and nitrogen-containing species relative to sulfur-rich components at the lithium surface.

**
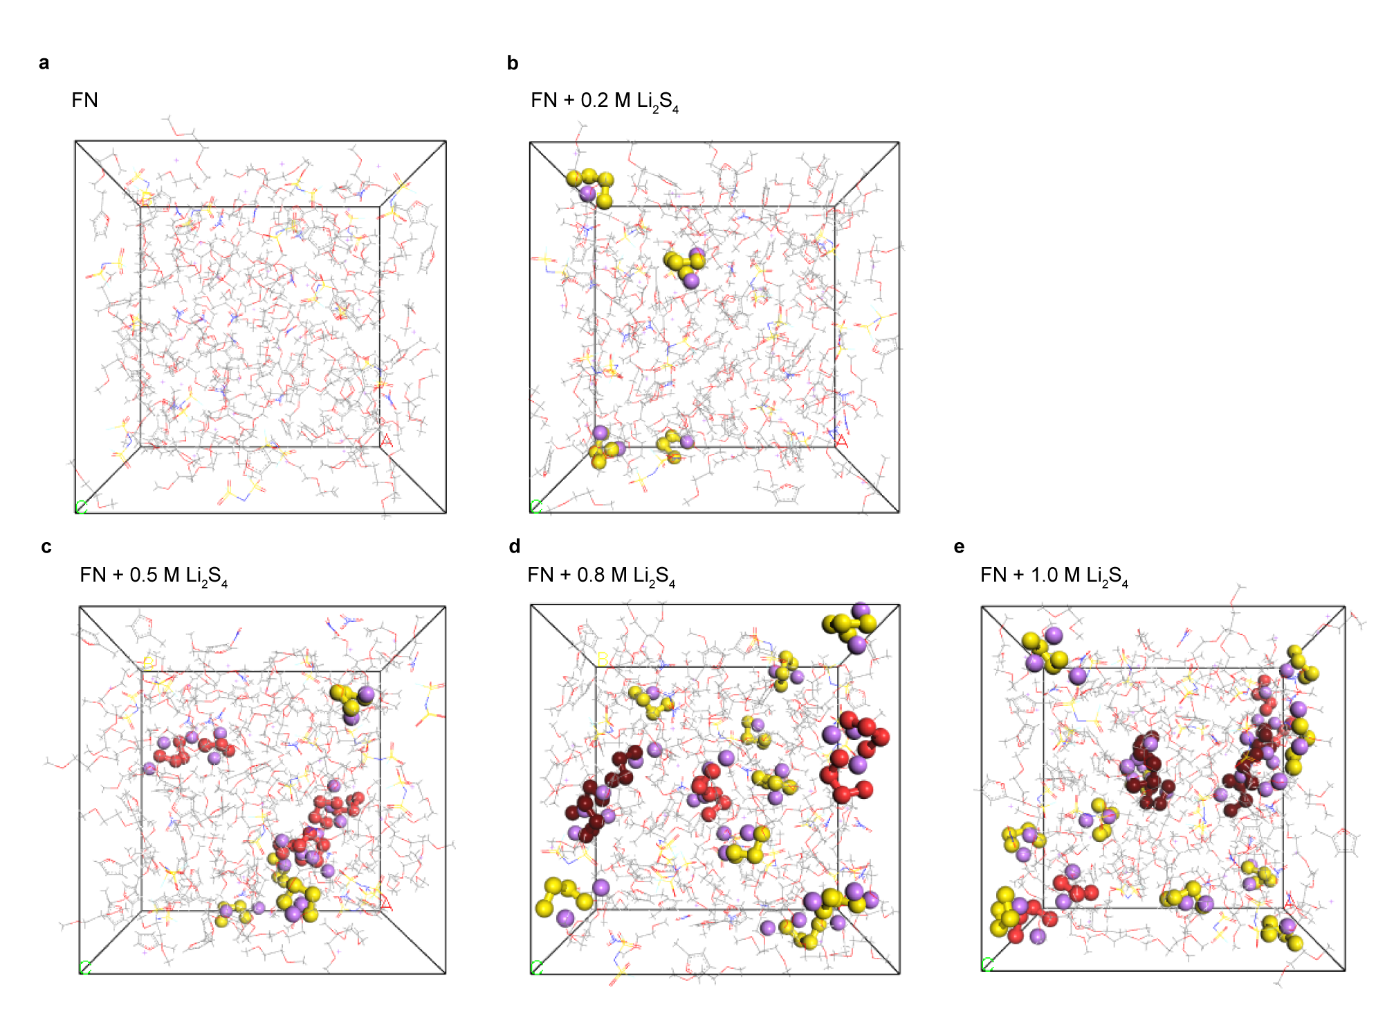
**

**Supplementary Figure 12. Snapshot from MD simulation conducted after 5nm simulation.** **a,** FN electrolyte **b,** FN + 0.2 M Li2S4 **c,** FN + 0.5 M Li2S4 **d**, FN + 0.8 M Li2S4. e, FN + 1.0 M Li2S4. Electrolyte components other than LiPS species were depicted as lines to better illustrate the formation of LiPS-rich phases.

**
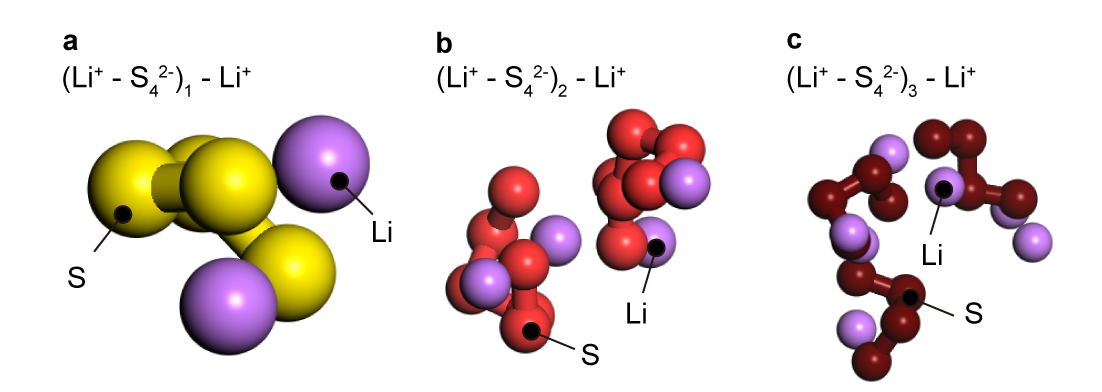
**

**Supplementary Figure 13. Magnified snapshot images of single-linkage LiPS and multi-linkage LiPS from MD simulation. a,** (Li+ - S42−)1 - Li+ **b,** (Li+ - S42−)2 - Li+ **c,** (Li+ - S42−)3 - Li+ (Lithium: purple, Sulfur: yellow, scarlet and brown). Supplementary Fig. 8 and 13 shows that as the LiPS concentration in the electrolyte increases, LiPS species increasingly aggregate, forming interconnected networks unlike those observed at lower concentrations. As a result, LiPS species with multiple linkages emerge, suggesting the formation of localized LiPS-rich phases.

**
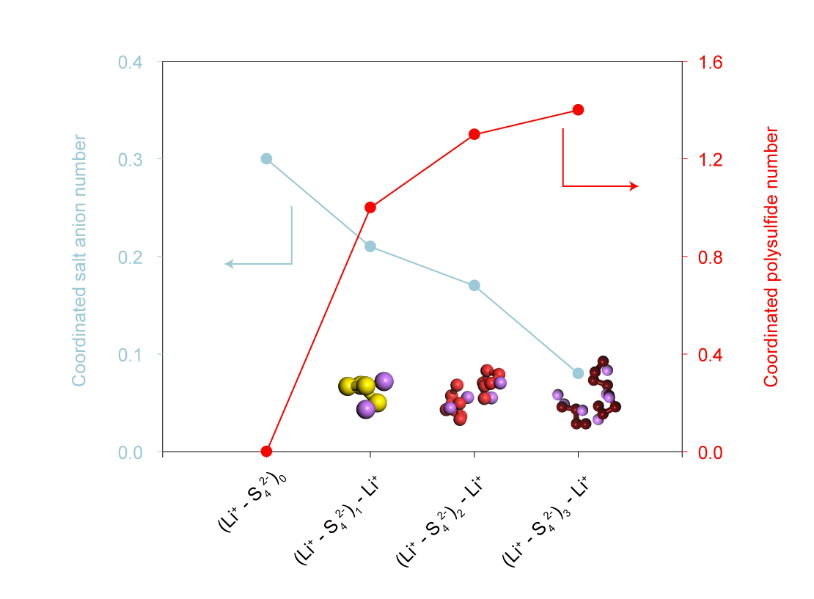
**

**Supplementary Figure 14.** **Number of salt anions and PS coordinated to Li+ for various LiPS aggregate structures.** The coordination number was calculated by averaging the number of species coordinated to Li+ during the MD simulation**.** When more PS species coordinate with Li⁺, larger LiPS clusters are formed, leading to reduced anion participation and the emergence of anion-deficient structures.

**
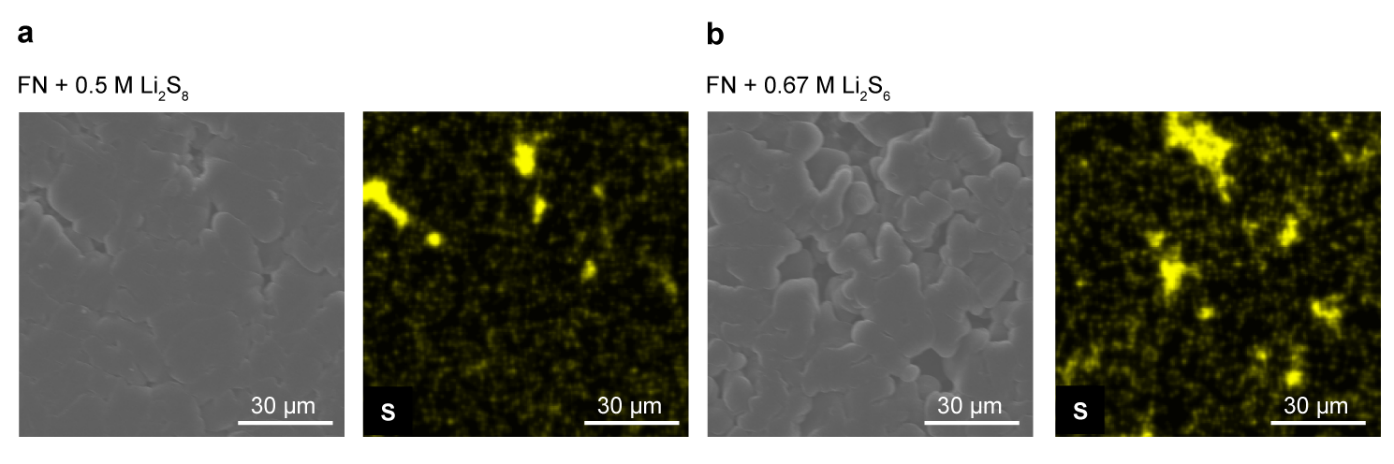
**

**Supplementary Figure 15. SEM images and sulfur EDS mapping of Li electrodes collected from Li|Ni half cells after 15 cycles at 1 mA cm−2 / 1 mAh cm−2.** **a,** FN + 0.5 M Li2S8 and **b**, FN + 0.67 M Li2S6. The LiPS concentration was adjusted to 14 wt% to reflect their actual level in Li─S full cells.

**
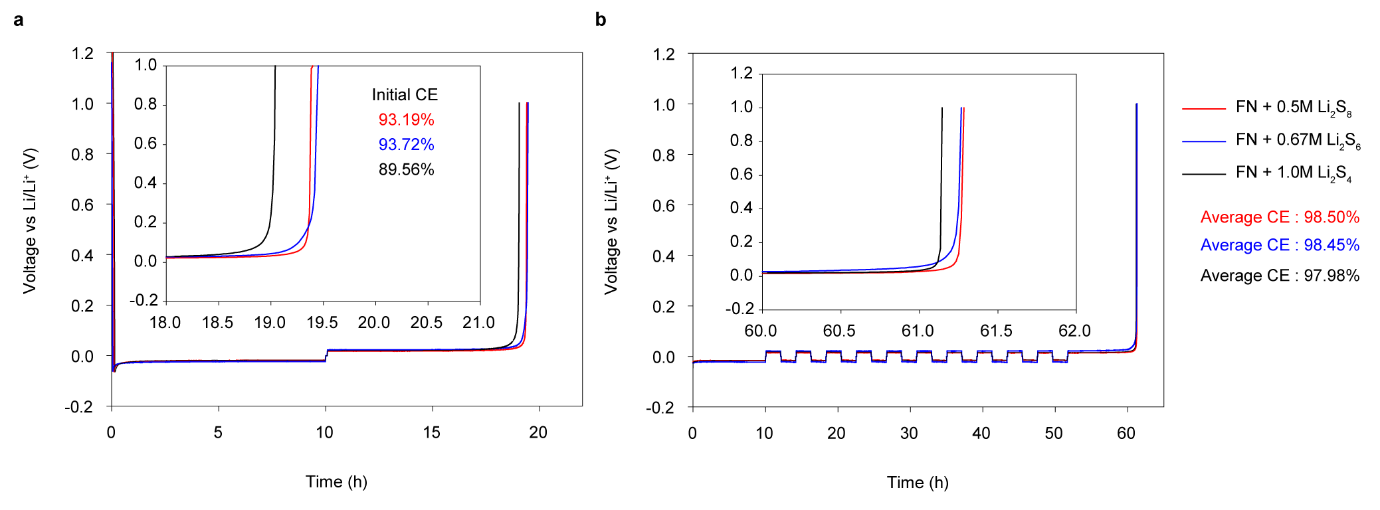
**

**Supplementary Figure 16. CE measurements of the Li|Ni cells with FN + 0.5 M Li2S8, FN + 0.67 M Li2S6, and FN + 1.0 M Li2S4.** **b**, Average CE measurements obtained using the modified Aurbach method. **a**, Initial CE measurements.

**
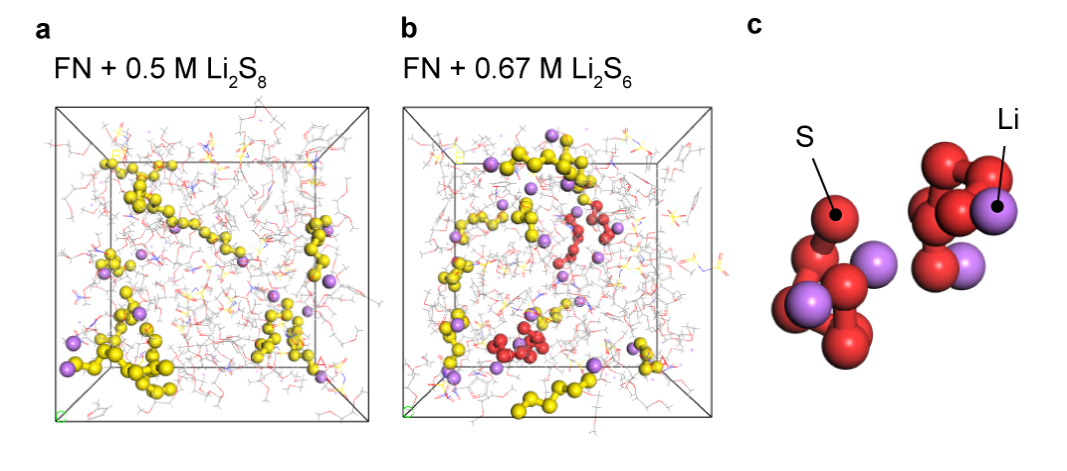
**

**Supplementary Figure 17. Snapshot from MD simulation conducted after 5nm simulation and magnified snapshot of multi-linkage Li2S6 from MD simulation. a,** FN + 0.5M Li2S8 **a,** FN + 0.67M Li2S6 **c,** (Li+ - S6−2)2. Electrolyte components other than LiPS species were depicted as lines to better illustrate the formation of LiPS-rich phases.

**
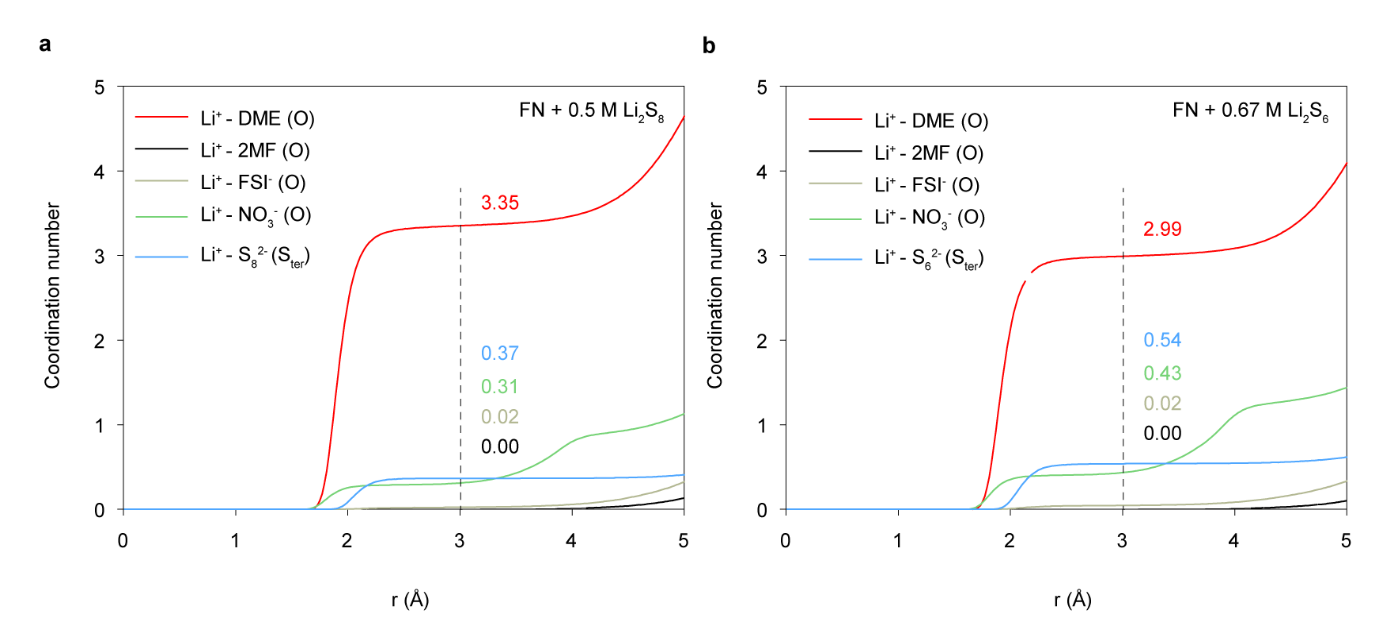
**

**Supplementary Figure 18. Coordination numbers of various electrolyte components in FN electrolyte containing Li2S8 and Li2S6**. **a,** FN + 0.5 M Li2S8 and **b,** FN + 0.67 M Li2S6. The lower coordination of S62− and S82− compared to S42− indicates a weaker tendency to form LiPS-rich phases.

**
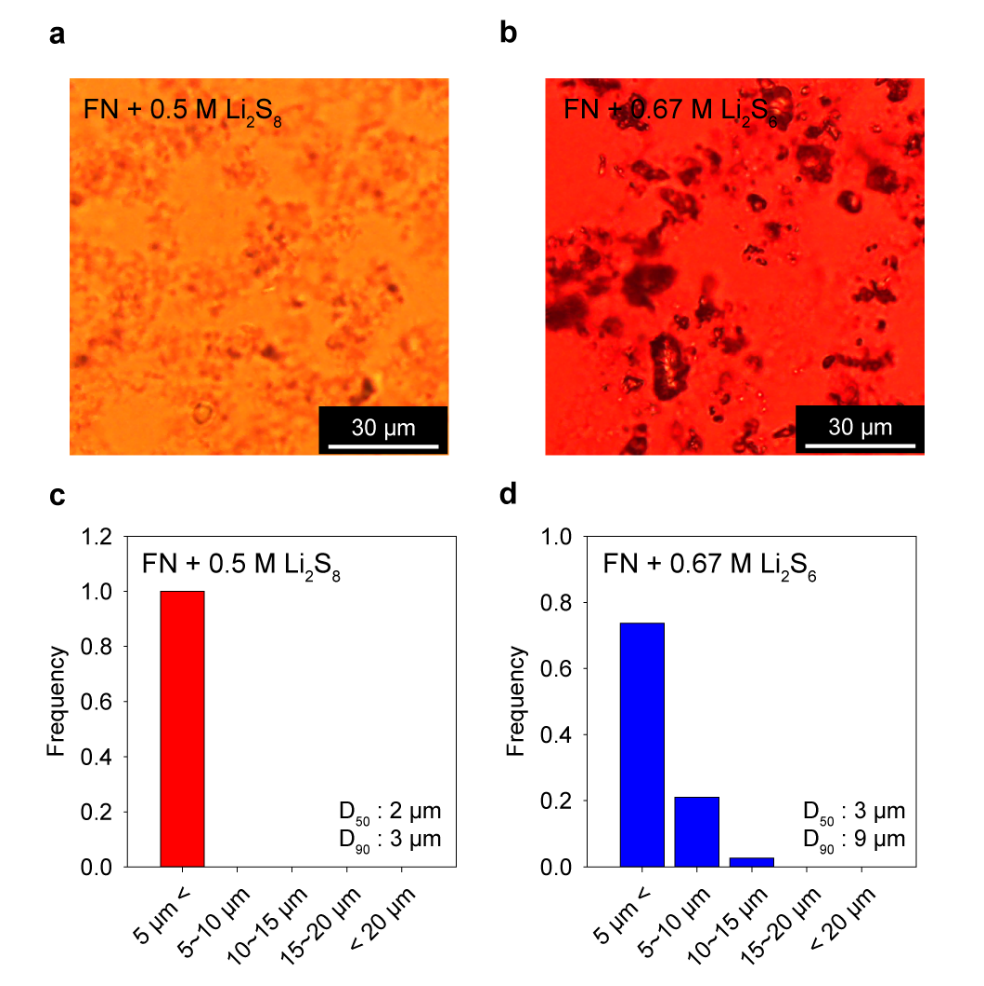
**

**Supplementary Figure 19. LiPS-rich phases in the Li2S8 and Li2S6-containing electrolytes. a,** FN + 0.5 M Li2S8 and **b,** FN + 0.67 M Li2S6.

**
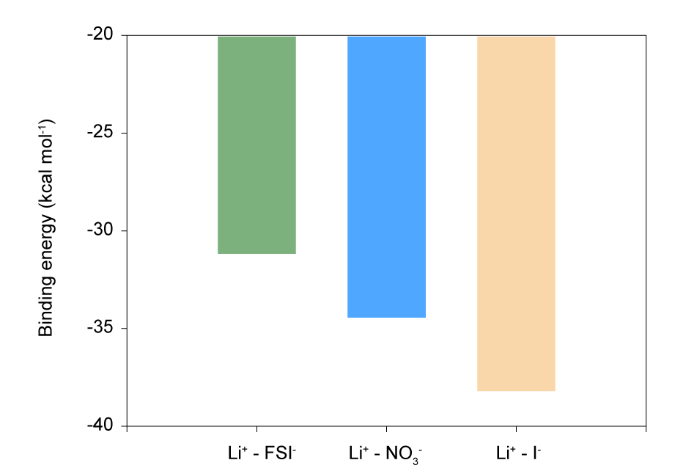
**

**Supplementary Figure 20. DFT calculation of Li+ binding energy for FSI−, NO3− and I− anions.**

**
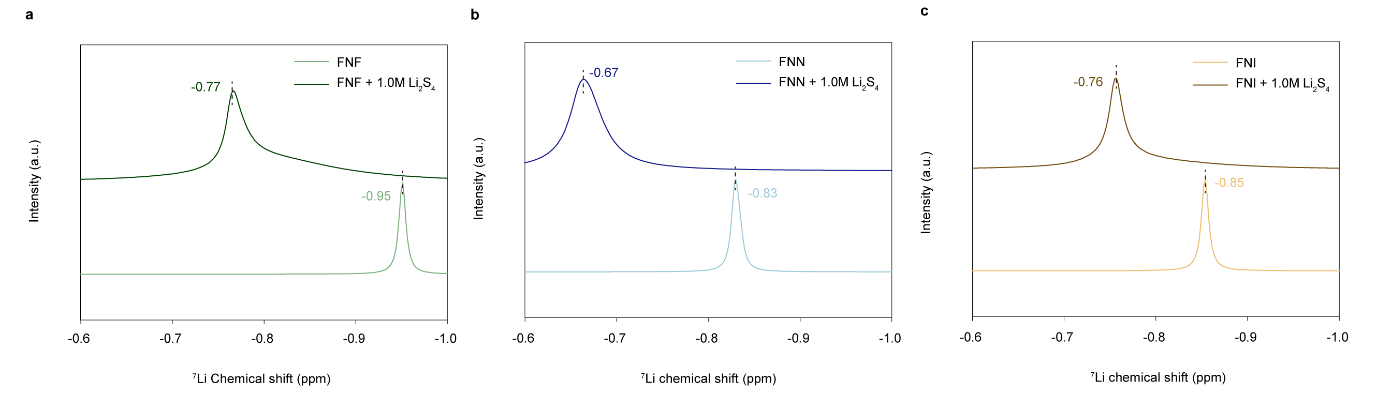
**

**Supplementary Figure 21. Comparison of 7Li NMR spectra of FNF, FNN, and FNI electrolytes with and without 1.0 M Li2S4 of from various electrolytes. a,** FNF **b**, FNN **c**, FNI.

**
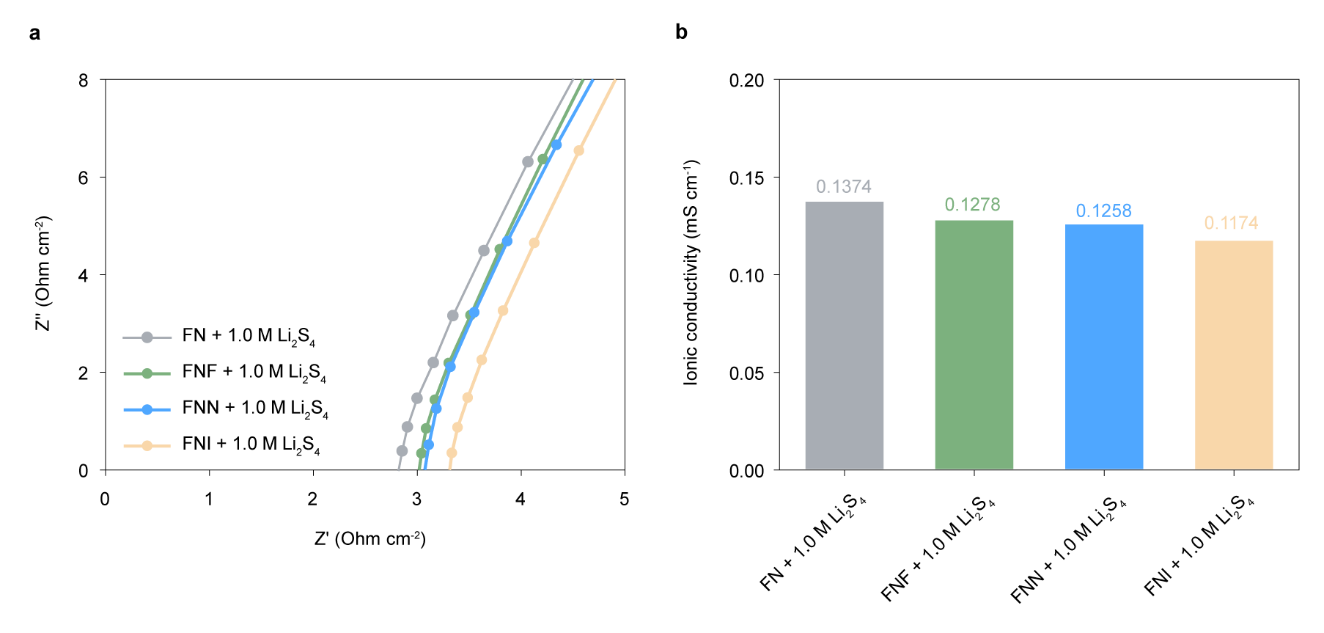
 Supplementary Figure 22. Calculation of ionic conductivities among electrolytes** **from SUS-SUS symmetric cell, captivated at Polypropylene separator. a**, Ohmic resistance from SUS-SUS symmetric cell **b**, calculated ionic conductivities of various electrolytes, captivated at polypropylene (PP) separator.

**
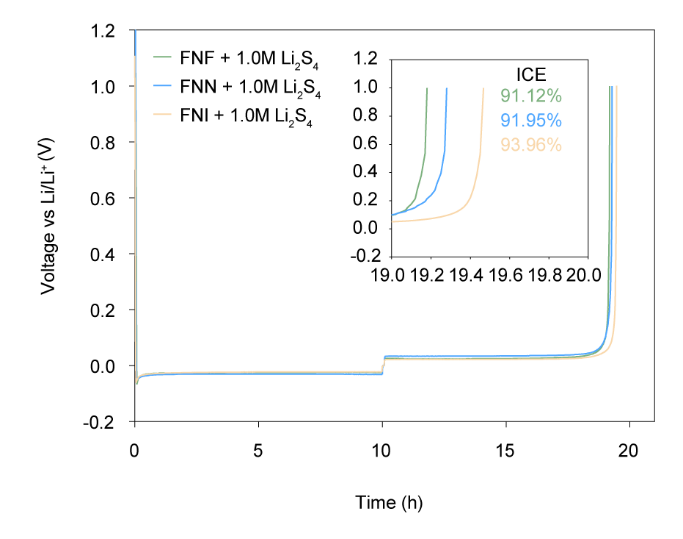
**

**Supplementary Figure 23. Initial CE measurement of the Li|Ni cells with FNF + 1.0 M Li2S4, FNN + 1.0 M Li2S4, and FNI + 1.0 M Li2S4.**

**
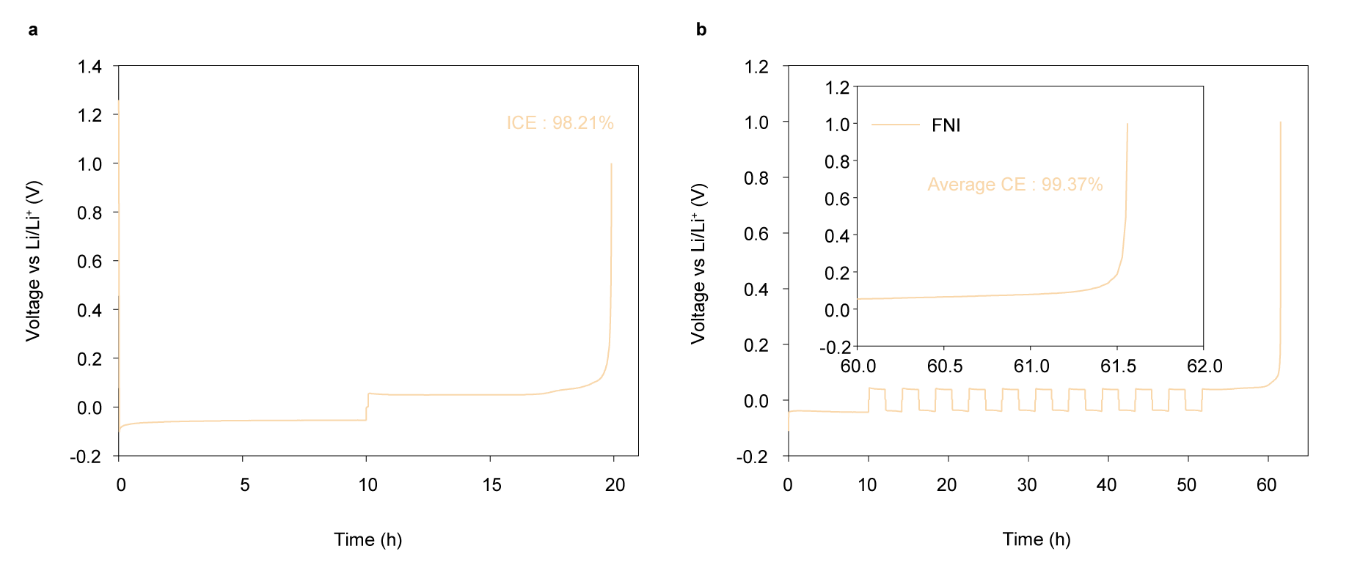
**

**Supplementary Figure 24. CE measurements of the Li|Ni cells with FNI. a**, Initial CE measurements. **b**, Average CE measurements obtained using the modified Aurbach method.


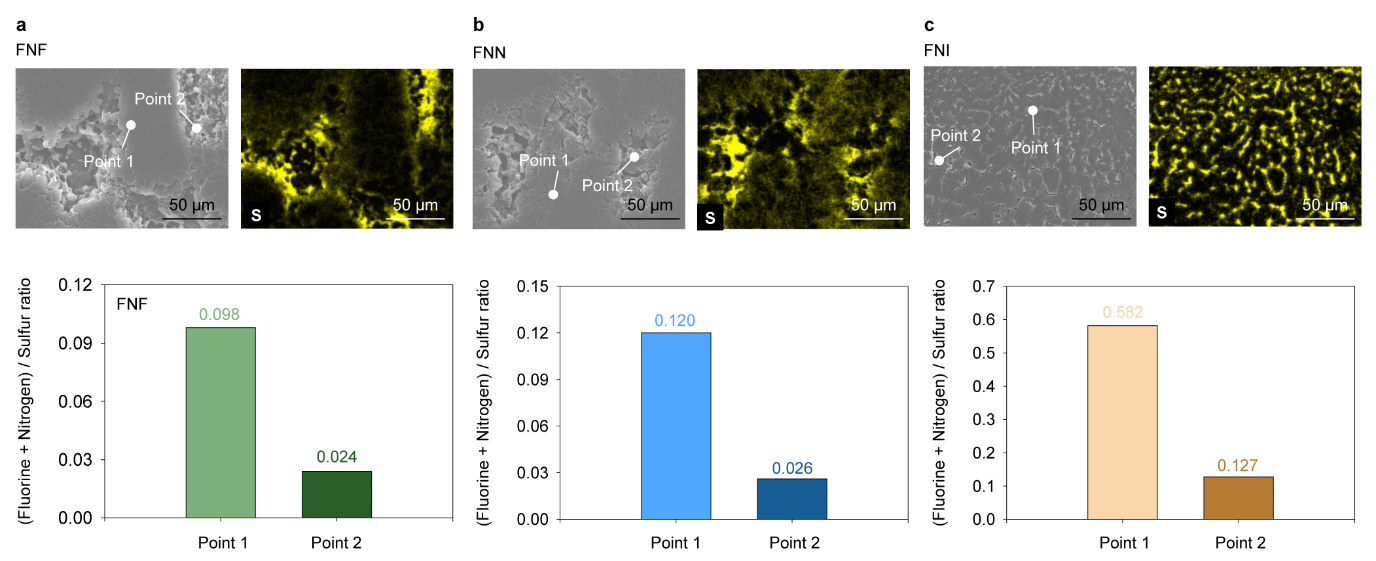


**Supplementary Figure 25. SEM images, sulfur EDS maps and (fluorine + nitrogen) / sulfur ratio comparison between two points of Li anodes retrieved from 0.27 Ah pouch cells (E/S ratio = 2.3 μL mgs**−**1)** **after 20 cycles at a rate of 0.2 C.** **a**, FNF, **b,** FNN, **c,** FNI. Two regions of the Li anodes were selected to represent the granular region (point 1) and the dendritic region (point 2).


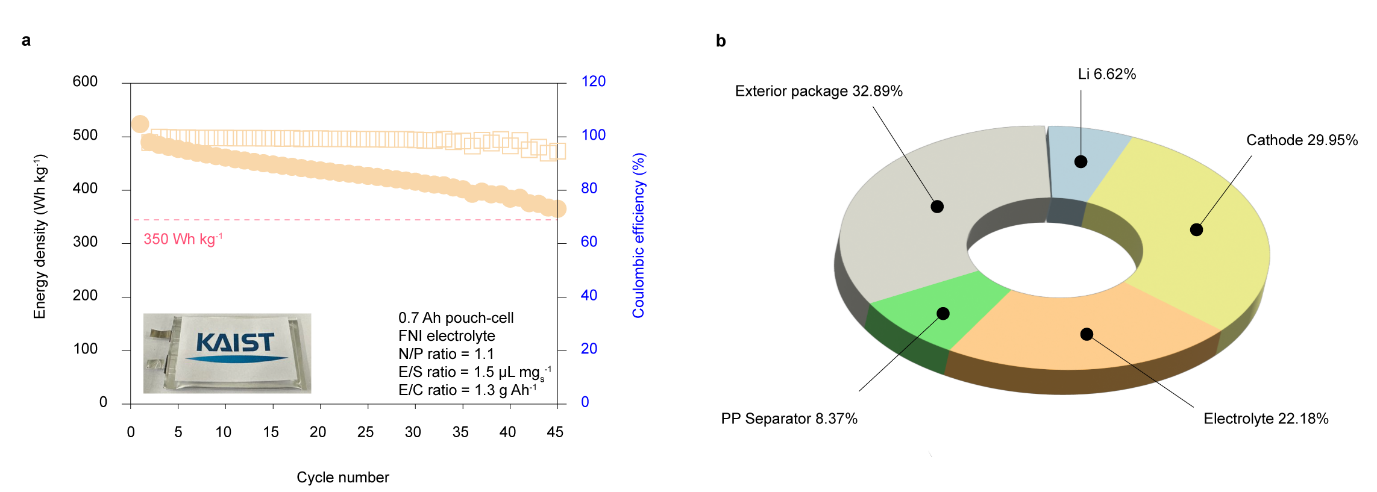


**Supplementary Figure 26. Cycling performance of high-energy density Li─S pouch cell. a,** Cycling performance of the assembled cell. **b**, Weight fraction of the cell components.


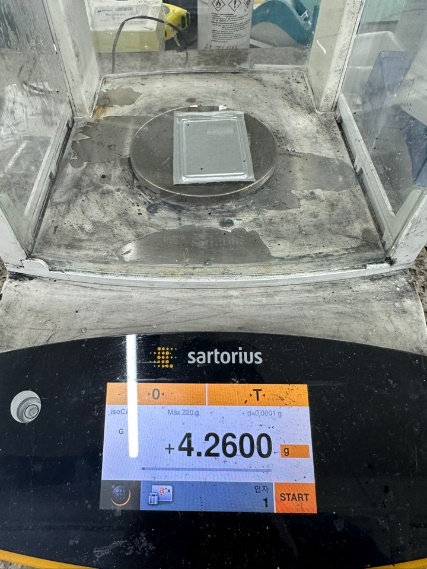


**Supplementary Figure 27. Weight of the assembled 8-stack pouch cells**. Exterior packages (tabs and Al packages), calculated from subtracting total weight and cell weight, was 1.401g.

| Double-side coated Sulfur electrode (slurry + Al current collector) | 1.276 g |
| --- | --- |
| Li metal | 0.282 g |
| Separator (PP 2400) | 0.356 g |
| Electrolyte (E/S ratio = 1.5) | 0.945 g |
| Capacity | 706.7 mAh |
| Average discharge voltage | 2.12 V |
| Energy density (Without tab/packages) | 524 Wh kg−1 |
| Energy density (With tab/packages) | 352 Wh kg−1 |

**Supplementary Table 1. Weight information for calculating energy densities of the 8-stacked pouch-cell**.
